# Supplementary material for: Caffeine can alleviate non-alcoholic fatty liver disease by augmenting LDLR expression via targeting EGFR
Source: Royal Society of Chemistry journal article supplement (doi:10.1039/d2fo02701a), 2023-01-01

# Original data

Figure1C

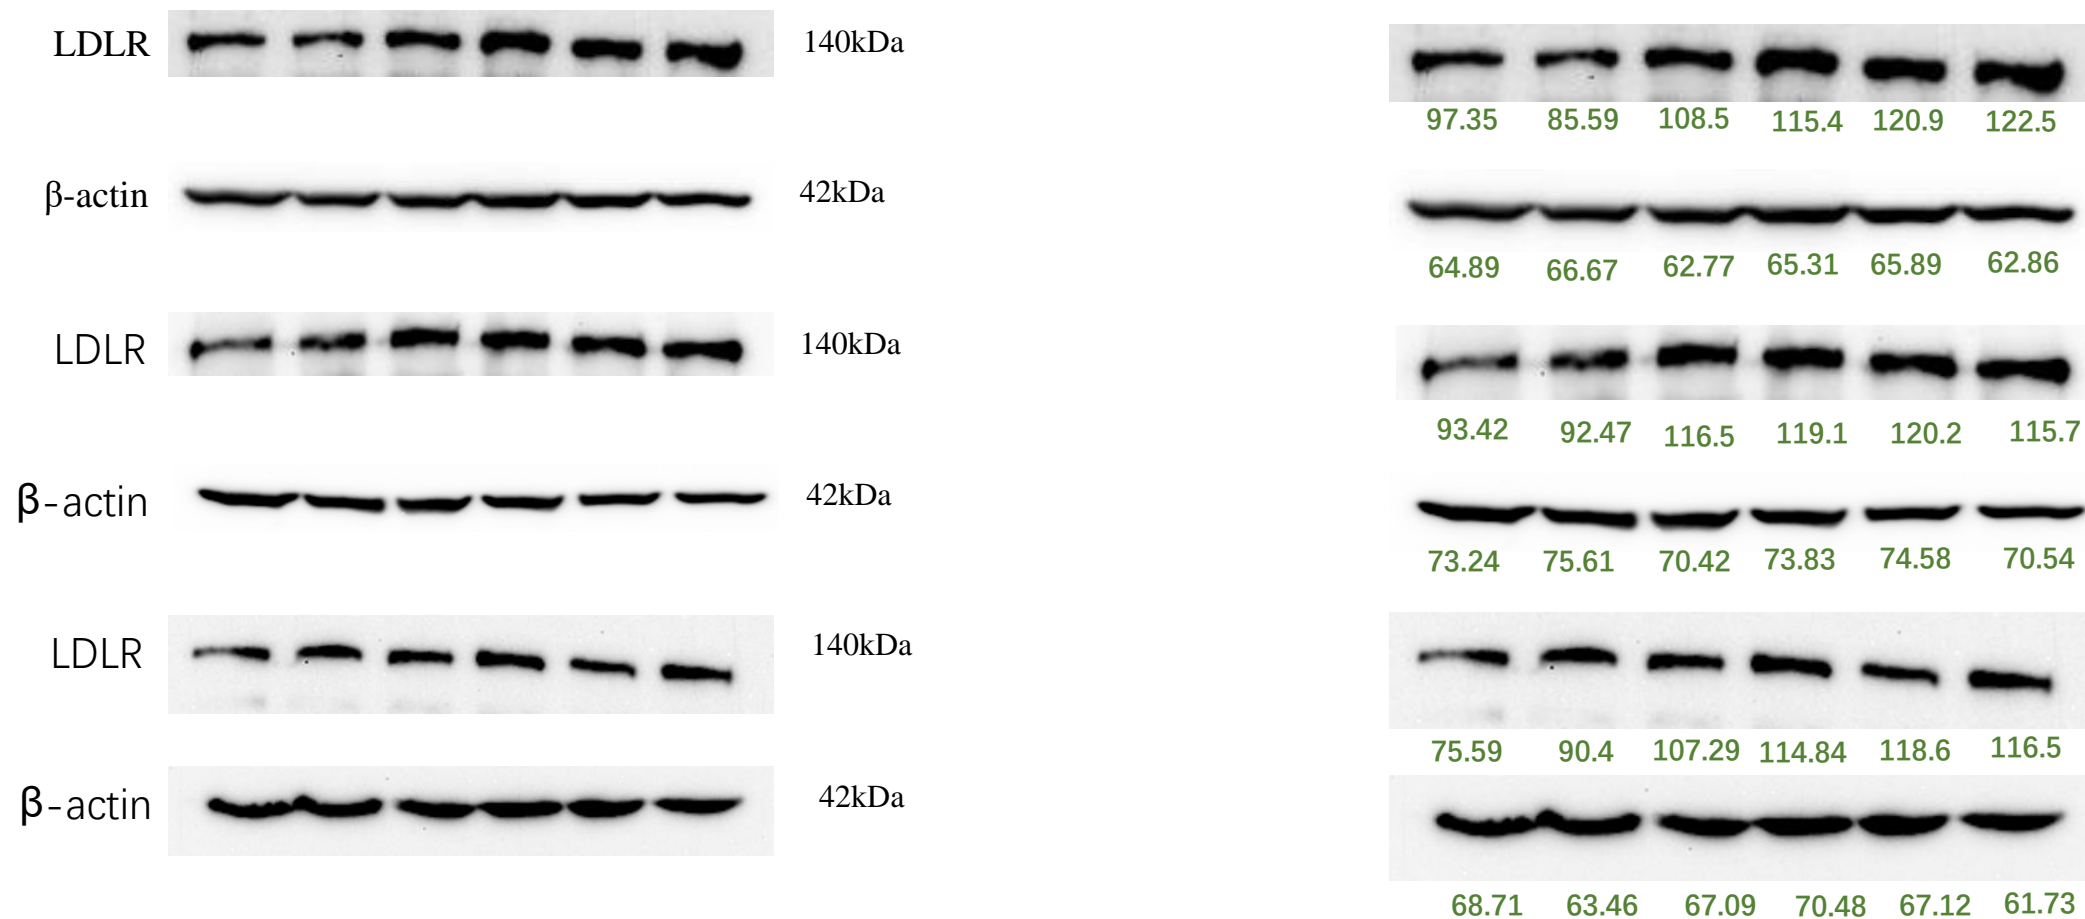

Figure2A

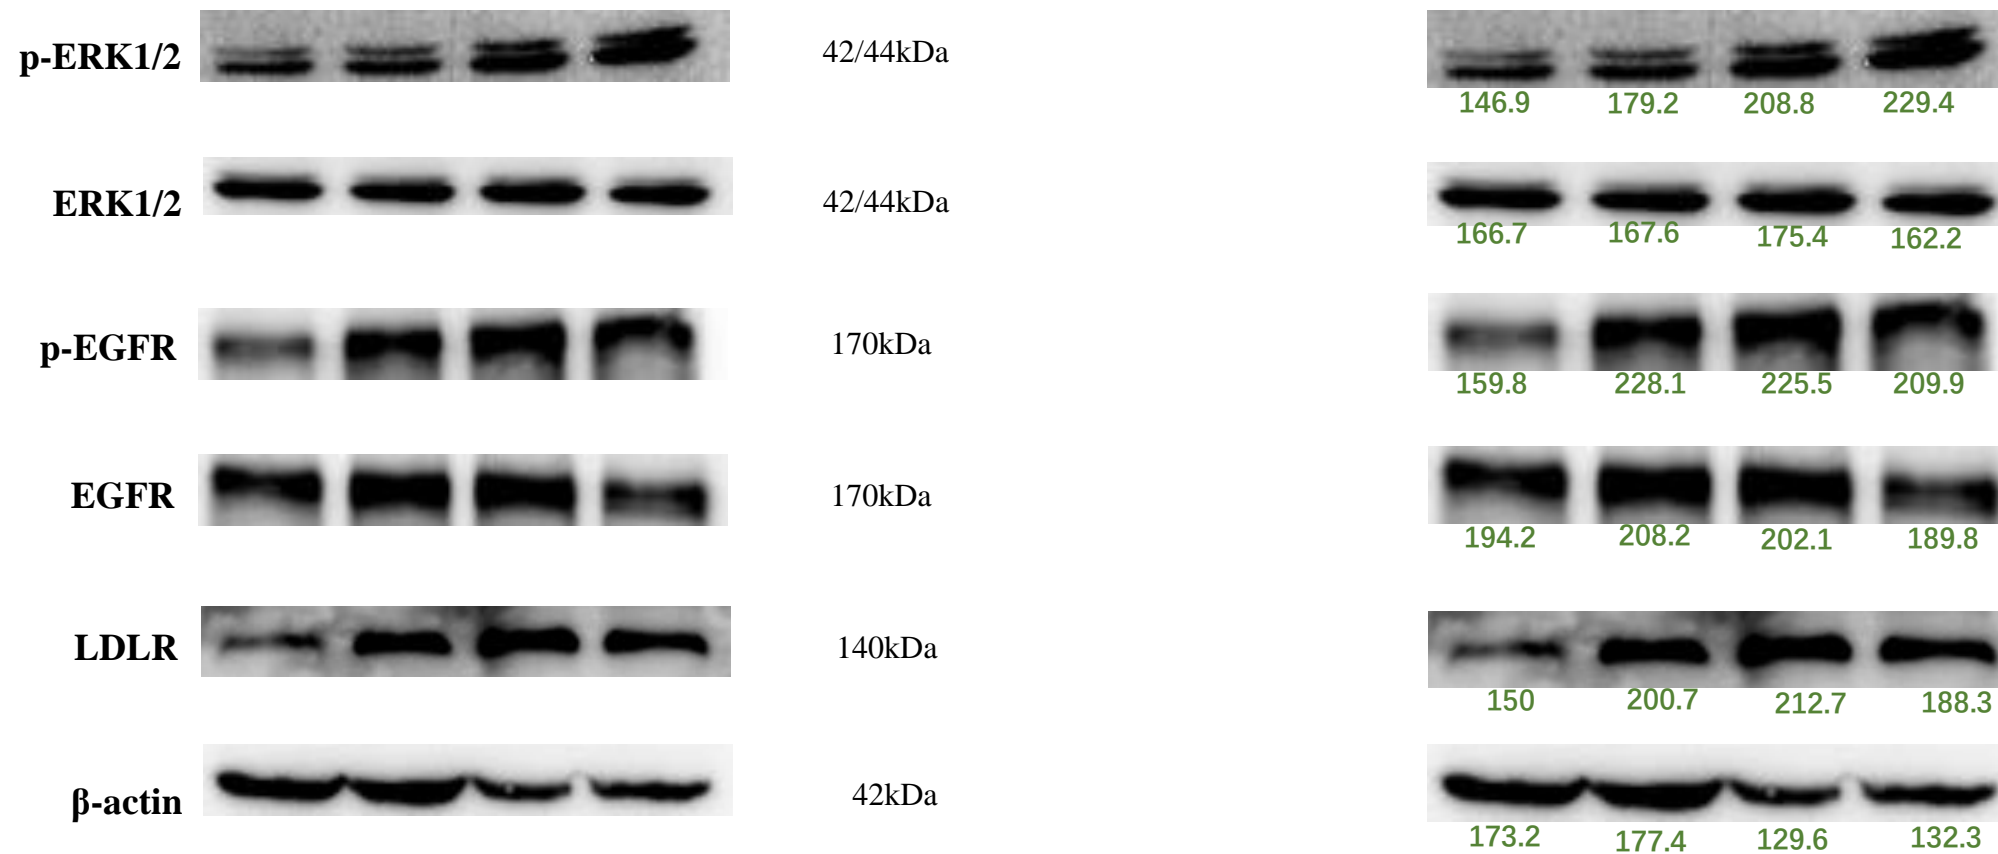

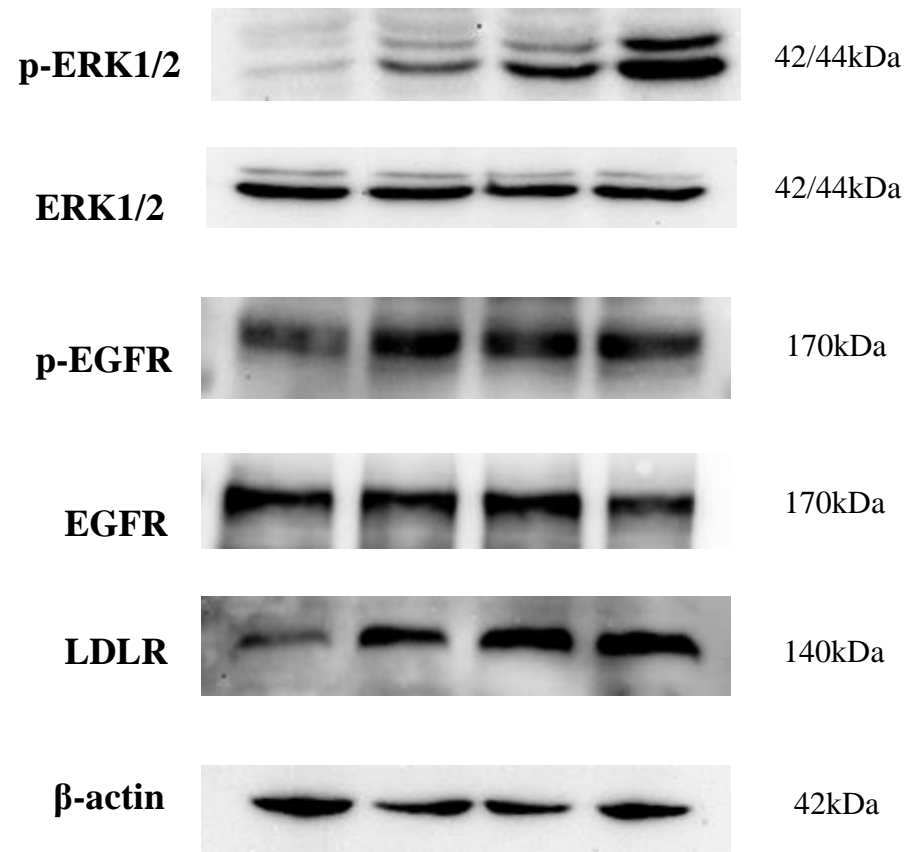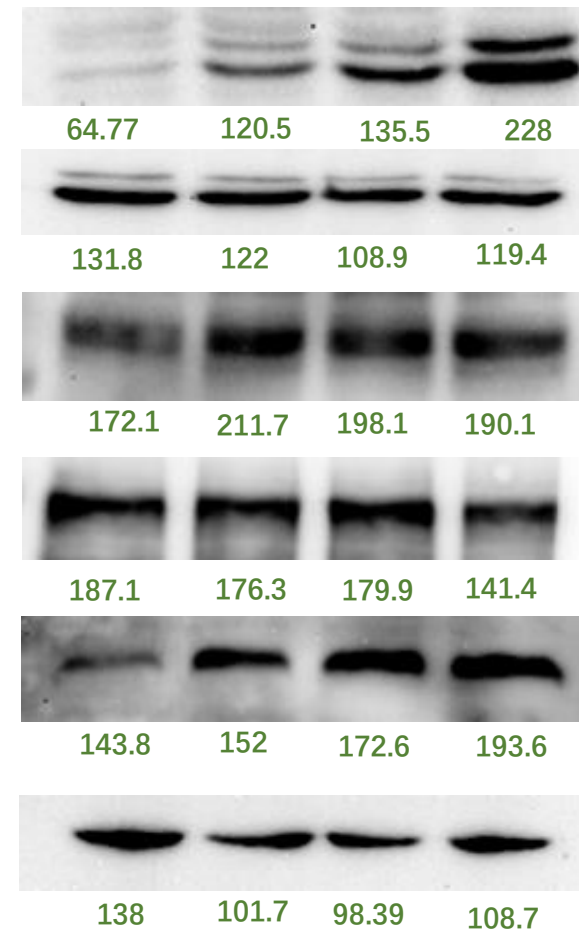

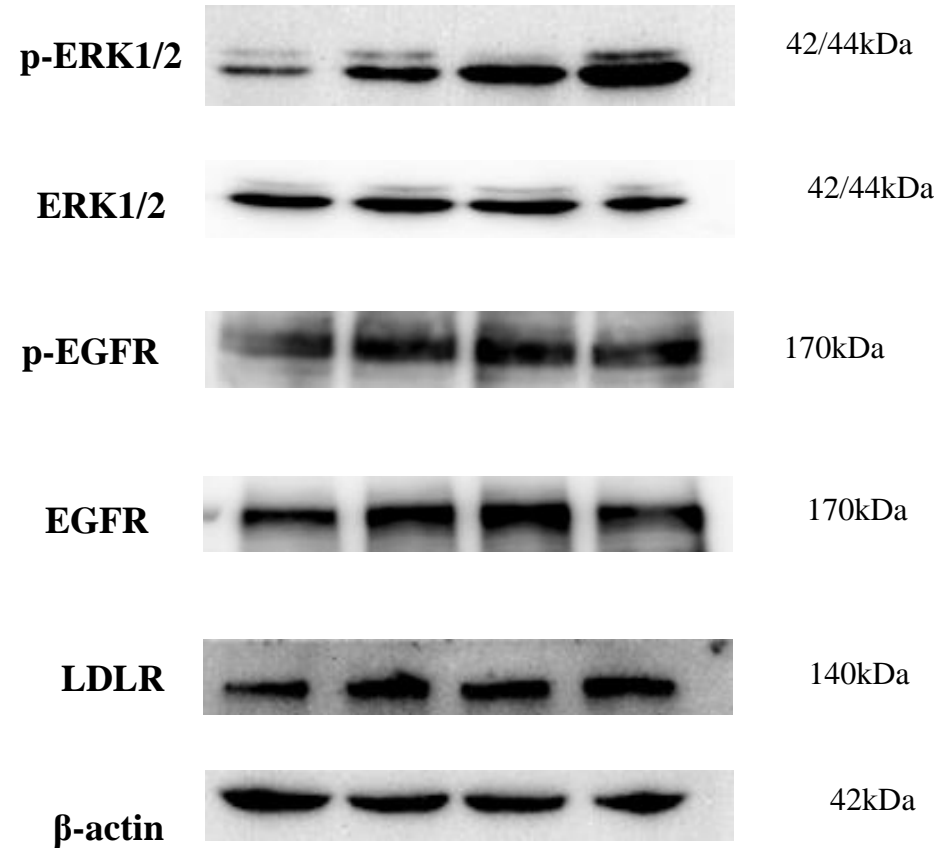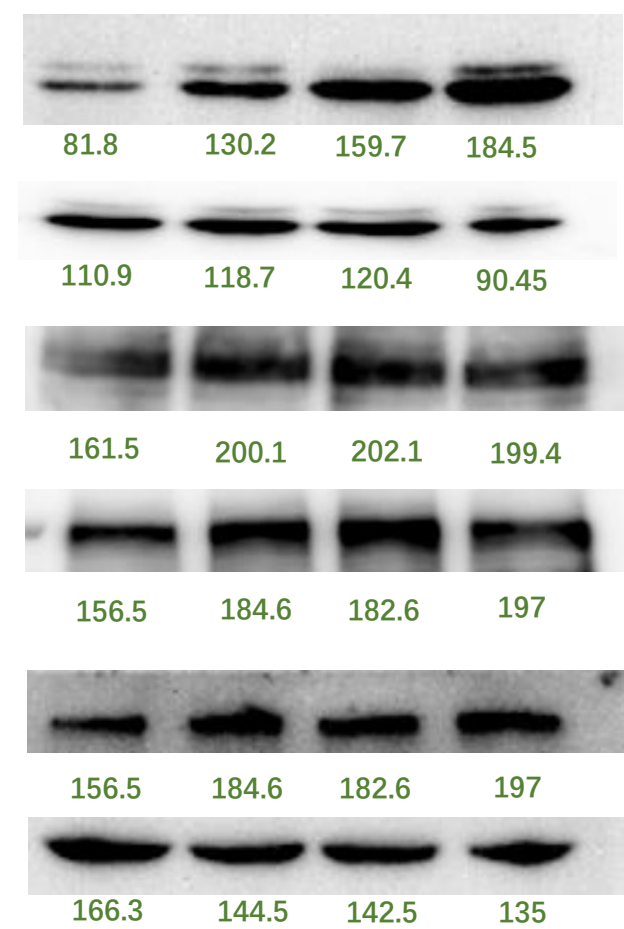

Figure2B

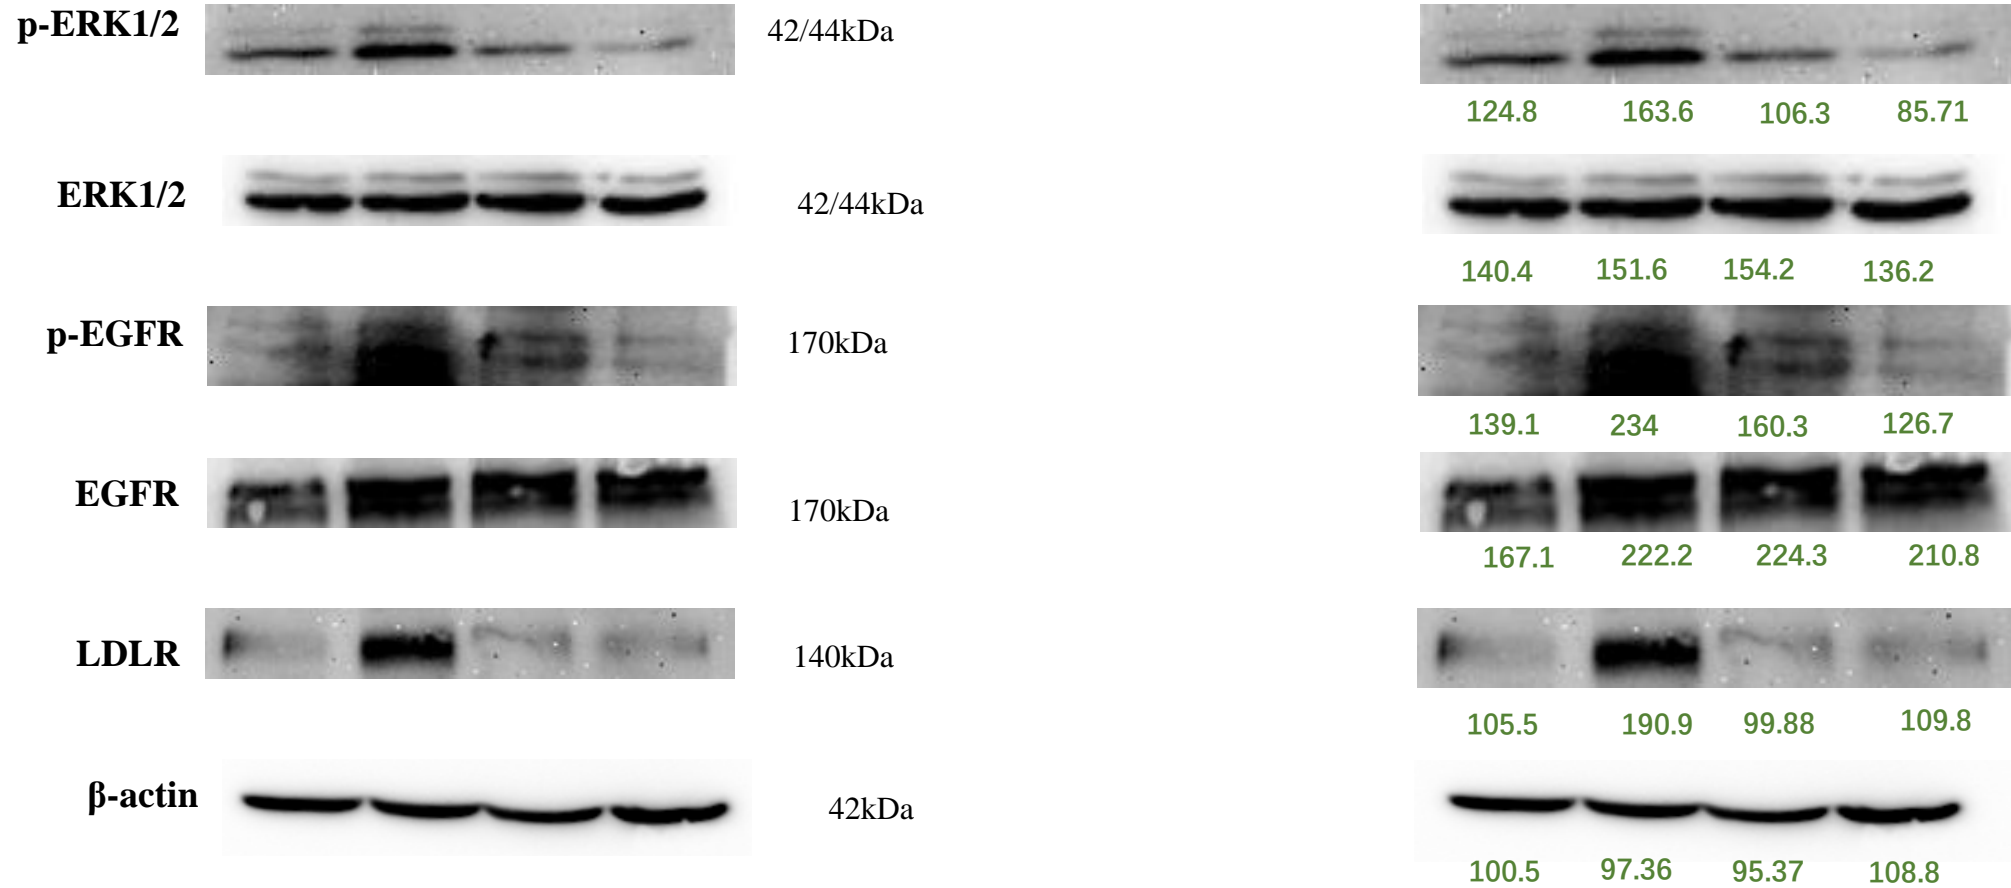

**p-ERK1/2**

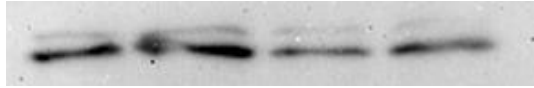

42/44kDa

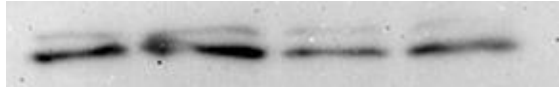

92.73 119.5 80.37 88.41

**ERK1/2**

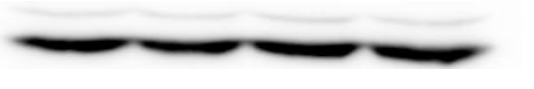

42/44kDa

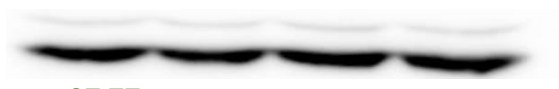

97.77 92.13 105.3 105.3

**p-EGFR**

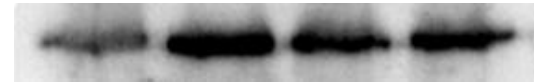

170kDa

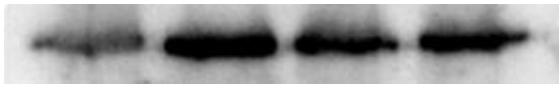

130.6 198 152.7 134

**EGFR**

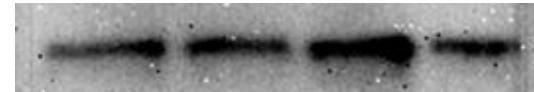

170kDa

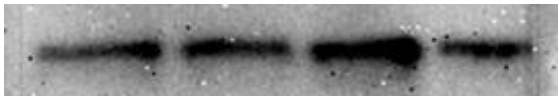

153.5 171.3 214.2 170.3

**LDLR**

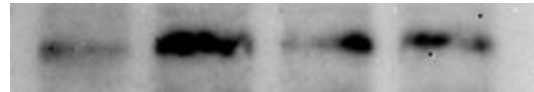

140kDa

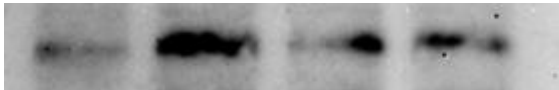

125.7 176 120.9 122

**$\beta$ -actin**

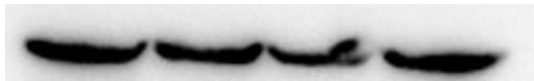

42kDa

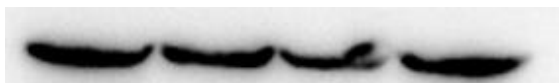

153.7 138.9 125.8 146.8

**p-ERK1/2**  42/44kDa

**ERK1/2**  42/44kDa

**p-EGFR**  170kDa

**EGFR**  170kDa

**LDLR** 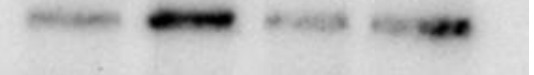 140kDa

**$\beta$ -actin**  42kDa

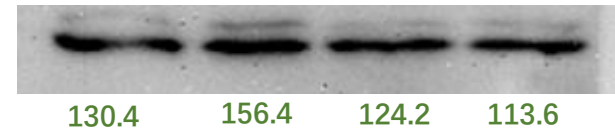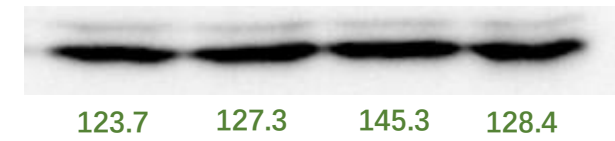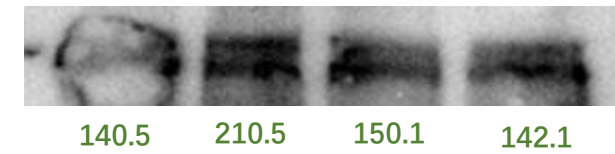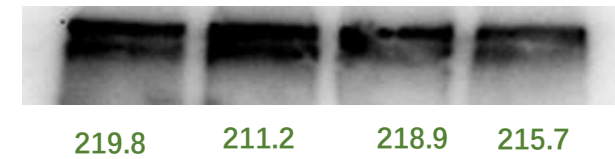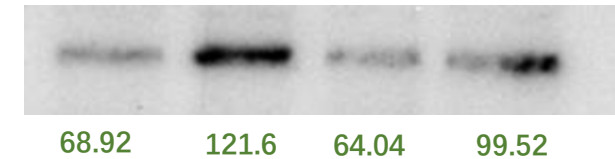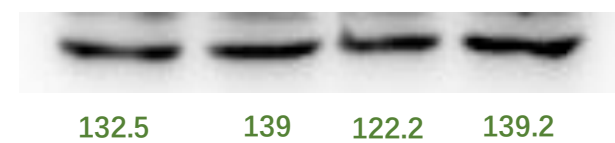

Figure5A

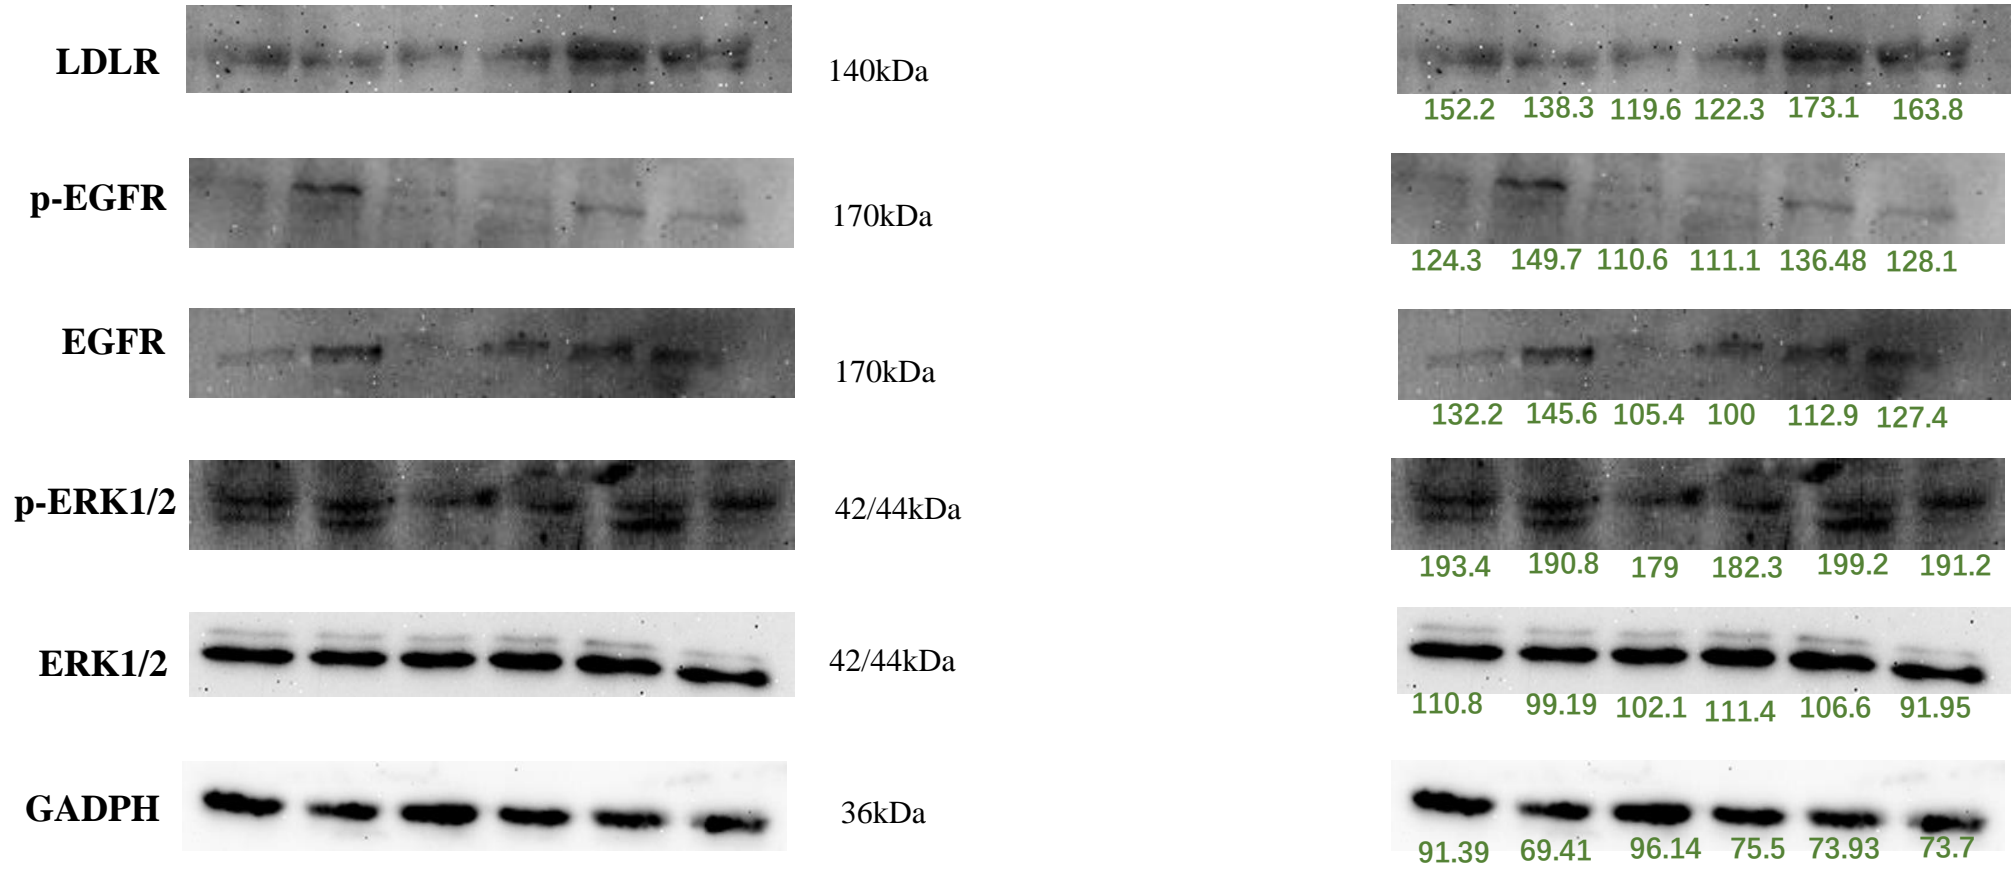



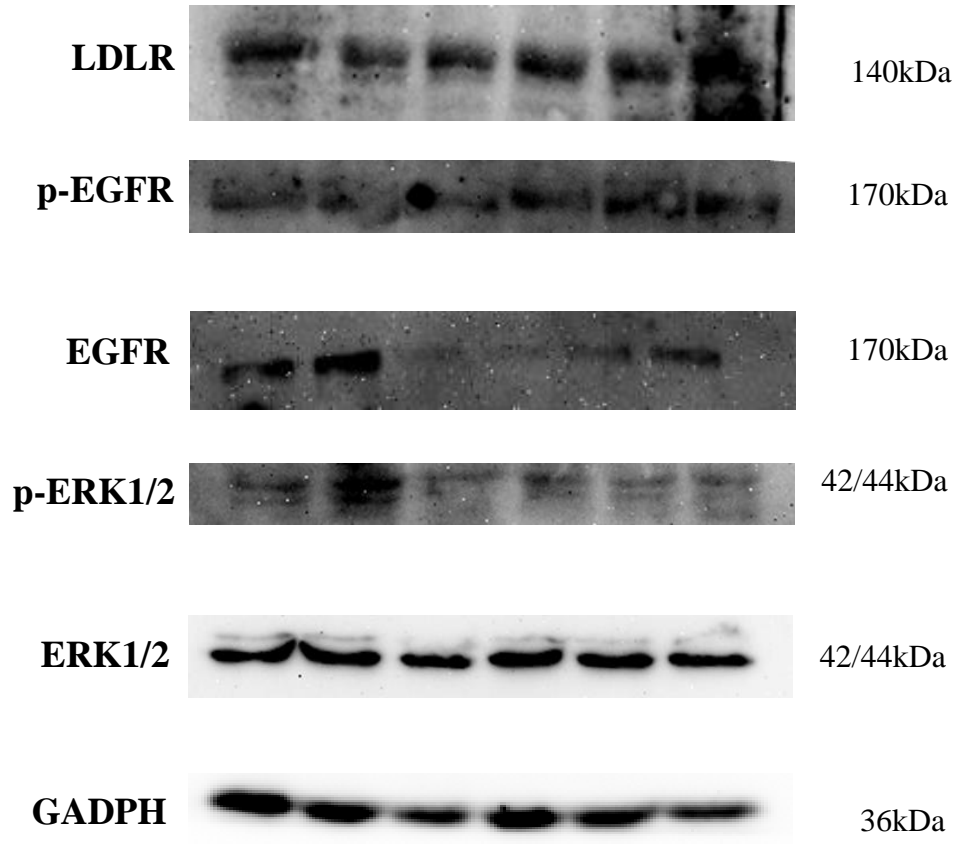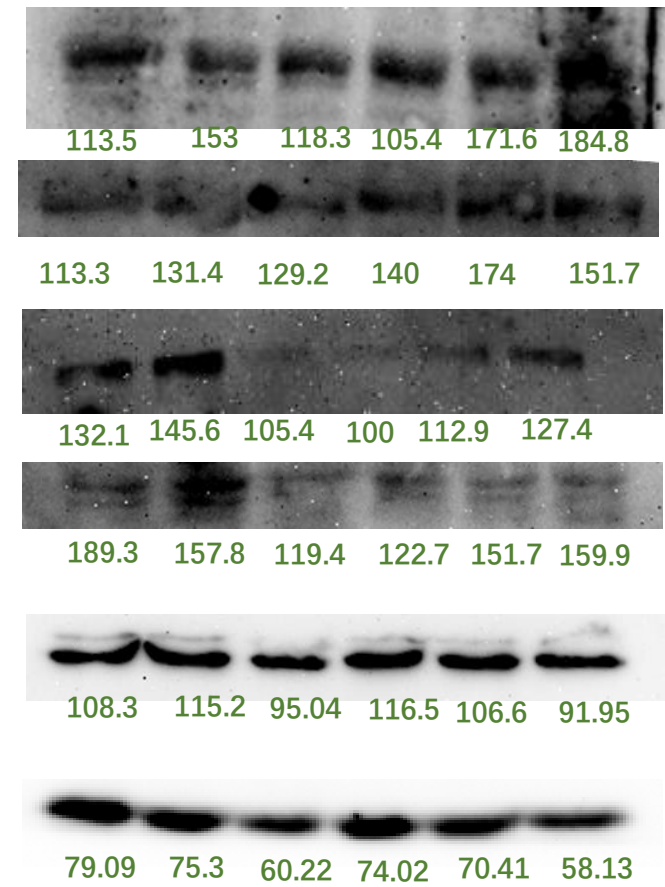

**LDLR** 140kDa

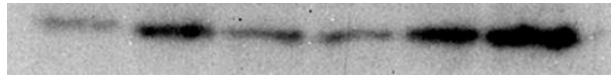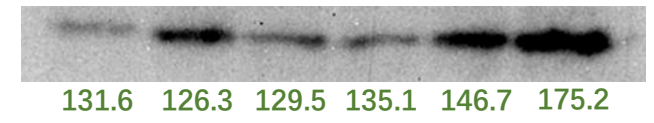

**p-EGFR** 170kDa

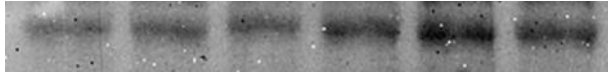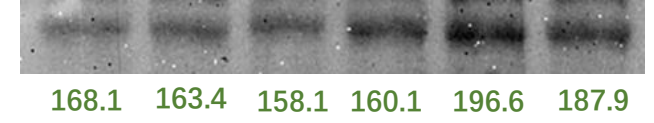

**EGFR** 170kDa

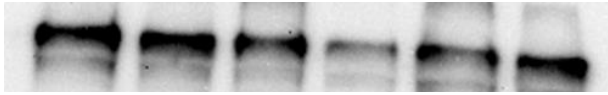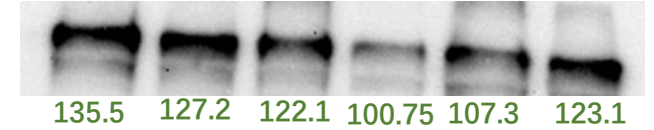

**p-ERK1/2** 42/44kDa

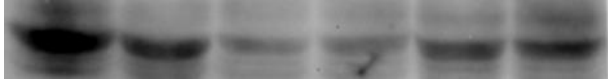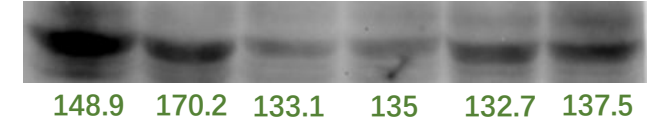

**ERK1/2** 42/44kDa

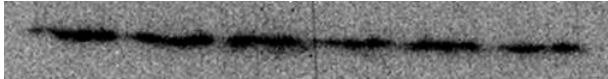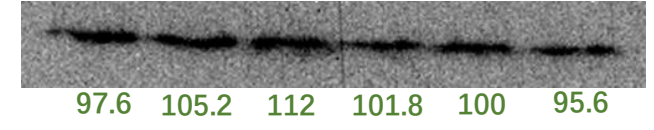

**GADPH** 36kDa

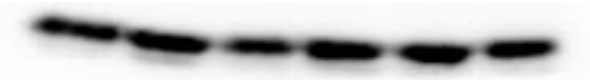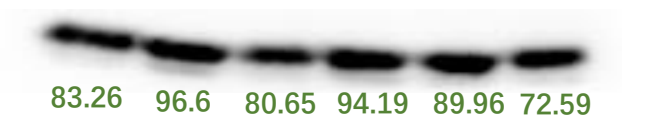

Supplement: d2fo02701a1.pdf [file d2fo02701a1.pdf]
